# Supplementary material for: Cobalt–nickel composite nano-grass as an excellent electrode for urea oxidation
Source: Royal Society of Chemistry journal article supplement (doi:10.1039/d4ra07911f), 2025-01-01
Supplement: d4ra07911f1.pdf [file d4ra07911f1.pdf]

## **Cobalt-nickel composite nano-grass as an excellent electrode for urea oxidation**

Norah Alwadai<sup>1</sup>, Manar Alshatwi<sup>1</sup>, Enas Taha Sayed<sup>1,2\*</sup>

<sup>1</sup> Department of Physics, College of Science, Princess Nourah bint Abdulrahman University, P.O. Box 84428, Riyadh 11671, Saudi Arabia

<sup>2</sup> Sustainable Energy & Power Systems Research Centre, RISE, University of Sharjah, P.O. Box 27272, Sharjah, the United Arab Emirates.

### **Mechanism of urea oxidation over Cobalt-based catalyst:**

Recently, researchers have concentrated on overcoming nickel's essential limitations as an electrocatalyst. This has been accomplished by alloying nickel with additive catalysts or discovering novel potential catalysts capable of oxidizing urea at low potentials while retaining excellent electrocatalytic activity. Cobalt and cobalt oxide-based materials are very appealing for electrochemical applications [1], including oxygen reduction reactions [2], electrochemical sensors [3], energy storage [4], methanol oxidation [5], or nitrite oxidation [6].

According to Equation (1), in alkaline media, urea combines with  $\text{OH}^-$  to produce water, nitrogen, carbon dioxide, and electrons at the anode of DUFC “direct urea fuel cell”. These electrons are transferred to the cathode side, where they react with oxygen and water, producing  $\text{OH}^-$  as seen in Equation (2). These hydroxyl ions are transferred through the anion exchange membrane from the cathode to the anode. Equation (3) shows the overall cell reaction of urea into carbon dioxide, nitrogen, and water, while producing electricity [7].

According to Equation (1), six electrons must be transferred for this process to occur (complete oxidation of the urea fuel at the anode). Two electrons are needed for the oxidation of the CO, four electrons are needed for the dehydrogenation of the N-H bonds, and N-N coupling that does not involve electron transfer. Understanding the urea oxidation reaction's (UOR) microscopic route is essential to the purposeful design of catalysts that would improve the activity of the electrocatalytic reaction.

Anodic reaction

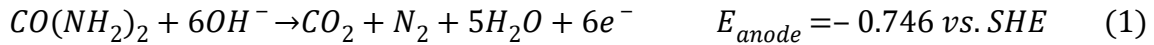

Cathodic reaction

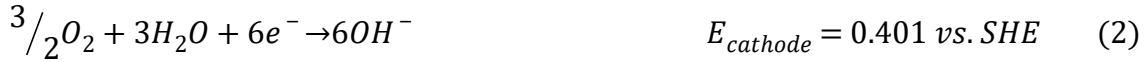

Overall cell reaction

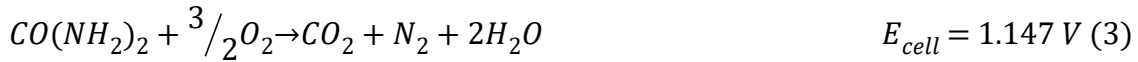

NiOOH/Ni(OH)<sub>2</sub> is the active site that formed when nickel or nickel oxide is inserted in an alkali, Equation 4[8]:

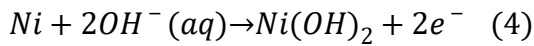

While performing the activation process (Cyclic voltammetry at 0.05 Vs<sup>-1</sup> for 100 cycles in urea free KOH solution), the nickel hydroxide is converted into nickel oxy-hydroxide (NiOOH), Equation 5:

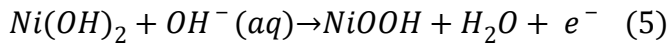

In the case of bare NF, NiOOH/Ni(OH)<sub>2</sub> is taking part as the main active site, while it took place in the activity of the Co/NF as Nickel exists in the NF support of the Cobalt hydroxide catalyst (Co/NF).

The formation of the CoOOH/Co(OH)<sub>2</sub>, which is considered as an active site for the urea oxidation [9, 10] can be described in a similar way to the formation of the NiOOH/Ni(OH)<sub>2</sub> in alkaline media [11-14]. In alkaline media, the cobalt metal or its oxides is converted into the hydroxide form according to Equation 6:

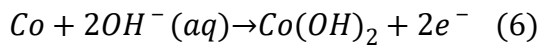

While performing the activation process, the cobalt hydroxide is converted into cobalt oxyhydroxide (CoOOH), Equation 7:

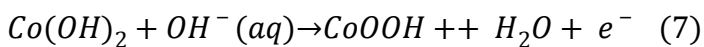

Cobalt catalyst enhances the adsorption and dehydrogenation of urea [1], Equation 8:

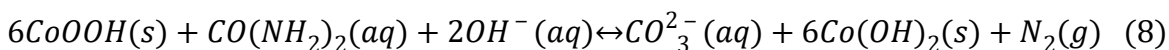

1. Alotaibi, N.; Hammud, H. H.; Al Otaibi, N.; Prakasam, T., Electrocatalytic properties of 3D hierarchical graphitic carbon–cobalt nanoparticles for urea oxidation. *ACS omega* **2020**, *5*, (40), 26038-26048.
2. Deng, X.; Yin, S.; Xie, Z.; Gao, F.; Jiang, S.; Zhou, X., Synthesis of silver@ platinum-cobalt nanoflower on reduced graphene oxide as an efficient catalyst for oxygen reduction reaction. *International Journal of Hydrogen Energy* **2021**, *46*, (34), 17731-17740.
3. Xie, F.; Cao, X.; Qu, F.; Asiri, A. M.; Sun, X., Cobalt nitride nanowire array as an efficient electrochemical sensor for glucose and H<sub>2</sub>O<sub>2</sub> detection. *Sensors and Actuators B: Chemical* **2018**, *255*, 1254-1261.
4. Ye, J.; Zhai, X.; Chen, L.; Guo, W.; Gu, T.; Shi, Y.; Hou, J.; Han, F.; Liu, Y.; Fan, C., Oxygen vacancies enriched nickel cobalt based nanoflower cathodes: Mechanism and application of the enhanced energy storage. *Journal of Energy Chemistry* **2021**, *62*, 252-261.
5. Zafeiratos, S.; Dintzer, T.; Teschner, D.; Blume, R.; Hävecker, M.; Knop-Gericke, A.; Schlögl, R., Methanol oxidation over model cobalt catalysts: Influence of the cobalt oxidation state on the reactivity. *Journal of Catalysis* **2010**, *269*, (2), 309-317.
6. Meng, Z.; Liu, B.; Zheng, J.; Sheng, Q.; Zhang, H., Electrodeposition of cobalt oxide nanoparticles on carbon nanotubes, and their electrocatalytic properties for nitrite electrooxidation. *Microchimica Acta* **2011**, *175*, 251-257.
7. Guo, F.; Ye, K.; Cheng, K.; Wang, G.; Cao, D., Preparation of nickel nanowire arrays electrode for urea electro-oxidation in alkaline medium. *Journal of Power Sources* **2015**, *278*, 562-568.
8. Martín-Yerga, D.; Henriksson, G.; Cornell, A., Effects of Incorporated Iron or Cobalt on the Ethanol Oxidation Activity of Nickel (Oxy)Hydroxides in Alkaline Media. *Electrocatalysis* **2019**, *10*, (5), 489-498.
9. Chen, F.; Gao, L.; Zhai, M.; Wu, N.; Zhang, X.; Guo, R.; Ma, M.; Hu, T., Carbon monoxide-resistant copper-cobalt nanocrystal@ nitrogen-doped carbon electrocatalysts for methanol oxidation reaction. *Journal of Alloys and Compounds* **2021**, *888*, 161563.
10. Nguyen, T.; Montemor, M. d. F., Metal Oxide and Hydroxide–Based Aqueous Supercapacitors: From Charge Storage Mechanisms and Functional Electrode Engineering to Need-Tailored Devices. *Advanced Science* **2019**, *6*, (9), 1801797.
11. Sheikh-Mohseni, M. H.; Nezamzadeh-Ejehieh, A., Modification of carbon paste electrode with Ni-clinoptilolite nanoparticles for electrocatalytic oxidation of methanol. *Electrochimica Acta* **2014**, *147*, 572-581.

12. Hu, J.; Lu, H.; Li, M.; Xiao, G.; Li, M.; Xiang, X.; Lu, Z.; Qiao, Y., Cobalt valence modulating in CoOx incorporated carbon nanofiber for enhanced glucose electrooxidation. *Materials Reports: Energy* **2022**, 2, (2), 100091.
13. Sayed, E. T.; Abdelkareem, M. A.; Alawadhi, H.; Salameh, T.; Olabi, A. G.; Alami, A. H., Facile and low-cost synthesis route for graphene deposition over cobalt dendrites for direct methanol fuel cell applications. *Journal of the Taiwan Institute of Chemical Engineers* **2020**, 115, 321-330.
14. Zhu, Y.-Q.; Zhou, H.; Dong, J.; Xu, S.-M.; Xu, M.; Zheng, L.; Xu, Q.; Ma, L.; Li, Z.; Shao, M.; Duan, H., Identification of Active Sites Formed on Cobalt Oxyhydroxide in Glucose Electrooxidation. *Angewandte Chemie International Edition* **2023**, 62, (15), e202219048.
